1 **Title:** Prediction of recessive inheritance for missense variants in human disease

2

3 **Authors:** Ben O. Petrazzini<sup>1,2</sup>, Daniel J. Balick<sup>1,2,3,4,5</sup>, Iain S. Forrest<sup>1,2,6</sup>, Judy Cho<sup>1,2,4</sup>, Ghislain

4 Rocheleau<sup>1,2</sup>, Daniel M. Jordan<sup>1,2\*</sup>, Ron Do<sup>1,2\*</sup>

5

6 **Affiliations:**

7 1. The Charles Bronfman Institute for Personalized Medicine, Icahn School of Medicine at Mount Sinai,  
8 New York, NY, USA

9 2. Department of Genetics and Genomic Sciences, Icahn School of Medicine at Mount Sinai, New York,  
10 NY, USA

11 3. Department of Medicine, Icahn School of Medicine at Mount Sinai, New York, NY, USA

12 4. Division of Genetics, Brigham and Women's Hospital, Harvard Medical School, Boston, MA, USA

13 5. Department of Biomedical Informatics, Harvard, Medical School, Boston, MA, USA

14 6. Medical Scientist Training Program, Icahn School of Medicine at Mount Sinai, New York, NY, USA

15 \* These authors jointly supervised this work.

16

17 **Correspondence:**

18 Ron Do, PhD

19 Annenberg Building, Floor 18 Room 80A

20 1468 Madison Ave

21 New York, NY-10029

22 Phone Number: 212-241-6206 | Fax Number: 212-849-2643

23 Email: ron.do@mssm.edu

24

25

26

27 **Abstract**

28 The prediction of pathogenic human missense variants has improved in recent years, but a more granular  
29 level of variant characterization is required. Further axes of information need to be incorporated in order  
30 to advance the genotype-to-phenotype map. Recent efforts have developed mode of inheritance prediction  
31 tools; however, these lack robust validation and their discrimination performance does not support clinical  
32 utility, with evidence of them being fundamentally insensitive to recessive acting diseases. Here, we  
33 present MOI-Pred, a three-way variant-level mode of inheritance prediction tool aimed at recessive  
34 identification for missense variants. MOI-Pred shows strong ability to discriminate missense variants  
35 causing autosomal recessive disease (area under the receiver operating characteristic (AUROC)=0.99 and  
36 sensitivity=0.85) in an external validation set. Additionally, we introduce an electronic health record  
37 (EHR)-based validation approach using real-world clinical data and show that our recessive predictions  
38 are enriched for recessive associations with human diseases, demonstrating utility of our method. Mode of  
39 inheritance predictions - pathogenic for autosomal recessive (AR) disease, pathogenic for autosomal  
40 dominant (AD) disease, or benign – for all possible missense variants in the human genome are available  
41 at <https://github.com/rondolab/MOI-Pred/>.

42

43

44

45

46

47

48

49

50

51

52

## 53 **Introduction**

54 Computational methods to predict the effect of coding variants have numerous applications, such  
55 as the diagnosis of genetic diseases<sup>1-4</sup>, genetic association studies<sup>5-8</sup>, and drug design<sup>9,10</sup>. Currently  
56 available methods perform very well at discriminating pathogenic and benign missense variants, typically  
57 reporting accuracy in the range of 58-86%<sup>11-13</sup>. Each prediction uses a unique set of variant characteristics  
58 and shows different performances across datasets making ensemble approaches more accurate<sup>14-16</sup>. On the  
59 same basis, current guidelines recommend considering multiple prediction tools to inform decision  
60 making<sup>13</sup>. While these methods may perform very well, they do not consider granularity of a variant's  
61 effect on disease. The vast majority of these methods make a simple binary prediction: is the variant  
62 pathogenic, or is it benign? Some methods make more specific predictions about whether variants cause  
63 particular phenotypes<sup>17</sup>, but even these are generally still binary predictions about a single phenotype. The  
64 true shape of the genotype-to-phenotype map is much more complex and highly dimensional. A full  
65 assessment of a variant's effect on phenotype would include potentially pleiotropic effects on a variety of  
66 different phenotypes, from the molecular level to the systems level, as well as features that modify its  
67 genetic impact, such as penetrance and mode of inheritance. Large-scale computational approaches that  
68 incorporate different axes of genomic information can potentially be used to inform various aspects of  
69 variant function<sup>18</sup>.

70 Here, we focus on mode of inheritance as the next level of granularity to include in computational  
71 prediction of variant effect. The concept behind mode of inheritance is foundational to the field of  
72 genetics and in classical medical genetics it is considered one of the most important features to report  
73 about a pathogenic variant<sup>13,19,20</sup>. Studies have shown that disease diagnosis can be largely improved by  
74 incorporating pedigree information<sup>21-24</sup>. In spite of this, mode of inheritance has practically no role in  
75 current variant annotation pipelines. Efforts to resolve mode of inheritance mechanisms have fallen  
76 behind the gene discovery rate<sup>25</sup>, limiting the availability of such information in databases of validated  
77 clinically relevant variants. Even among databases that do provide mode of inheritance information, most  
78 notably Online Mendelian Inheritance in Man (OMIM)<sup>26</sup>, these annotations are present only for a small

79 fraction of 4,417 genes. They are also not necessarily reliable, since they derive almost entirely from  
80 anecdotal case reports with small pedigrees, and very few have been replicated across studies. Currently,  
81 35.5% of variants reported as “Pathogenic” or “Likely Pathogenic” in ClinVar<sup>27</sup> have no annotated mode  
82 of inheritance and cannot confidently be assigned one based on existing annotations. While some  
83 molecular and evolutionary features are known to be enriched in genes implicated in autosomal recessive  
84 (AR) disease<sup>28-33</sup>, these features are not widely used at the variant level to distinguish variants causing AR  
85 disease from variants causing autosomal dominant (AD) disease or benign variants. Additionally, there is  
86 some evidence that current variant effect prediction methods may be fundamentally insensitive to AR  
87 disease<sup>34,35</sup>, reinforcing the need for new methods specifically aimed at predicting variants causing AR  
88 disease<sup>36</sup>. Previous efforts at developing such methods underperform binary prediction tools, lack robust  
89 validation and have not achieved widespread use in the field<sup>16,37-39</sup>.

90 Here we present MOI-Pred, a three-way prediction method that labels missense variants as  
91 pathogenic for AR disease, pathogenic for AD disease, or benign. The method uses a random forest  
92 classifier to combine variant effect estimations with gene-level features that are predictive of AR or AD  
93 disease. The resulting predictor identifies pathogenic mutations with performance comparable to state-of-  
94 the-art binary prediction methods and distinguishes mode of inheritance at the variant level. Moreover,  
95 the tool accurately predicts disease case-control status for the three classes of mutations in an external  
96 validation using real-world electronic health record (EHR)-based clinical data. MOI-Pred addresses a  
97 shortcoming in current annotation pipelines by accurately predicting mode of inheritance, especially  
98 differentiating AR pathogenic variants from benign variants, while simultaneously improving granular  
99 predictions of variant effect crucial to achieve clinically relevant levels of accuracy.

100

## 101 **Results**

### 102 *Clinical variants missing mode of inheritance information*

103 ClinVar does not explicitly annotate mode of inheritance. Instead, this information is extracted  
104 from external resources such as OMIM or the Human Gene Mutation Database (HGMD)<sup>40</sup>. These

105 databases provide mainly gene-level information and only for a subset of diseases. Thus, most variants in  
106 ClinVar either lack a mode of inheritance annotation entirely or are simply labelled with the annotation of  
107 their corresponding gene. Only 4,126 genes in ClinVar have inheritance information, resulting in 37.63%  
108 of variants with undetermined mode of inheritance (**Supplementary Table 2**). Out of a total of 307,800  
109 unlabelled variants, 49,745 are Pathogenic (35.51% of all Pathogenic), 119,532 are Benign (41.38% of all  
110 Benign), 122,600 have Uncertain significance (35.30% of all Uncertain significance) and 15,923 have  
111 Conflicting interpretation of pathogenicity (38.19% of all Conflicting interpretation) (**Supplementary**  
112 **Table 2**).

113

#### 114 *Model Training*

115 We collected a training set of 2,481 Recessive and 1,248 Dominant pathogenic missense variants  
116 from ExoVar<sup>16</sup> and 3,729 Benign missense variants from gnomAD<sup>41</sup>, annotated with a wide range of  
117 features capturing functional and biological aspects of mode of inheritance. We fitted a random forest  
118 model on this training set, using 10-fold cross-validation and 100 different random train-test splits to  
119 assess performance. Feature selection was performed independently on each iteration, reducing the  
120 number of features to a minimum of 10 and a maximum of 18 (median across 100 models is 13 features  
121 (**Supplementary Figure 1**). In total, 19 unique features were selected across all 100 iterations for  
122 training, incorporating a range of functional, evolutionary and combined information (**Methods,**  
123 **Supplementary Table 1**).

124 The prediction models performed well in the Test set, with a mean area under the receiver  
125 operator characteristic (AUROC)=0.94/0.96/0.95 (standard deviation (SD)= $1.2 \times 10^{-2}$ / $6.8 \times 10^{-3}$ / $1.3 \times 10^{-2}$ ),  
126 sensitivity=0.75/0.76/0.92 (SD= $3.8 \times 10^{-2}$ / $3.0 \times 10^{-2}$ / $2.8 \times 10^{-2}$ ), and specificity=0.94/0.95/0.82  
127 (SD= $1.3 \times 10^{-2}$ / $1.4 \times 10^{-2}$ / $2.2 \times 10^{-2}$ ) for Recessive/Dominant/Benign classes, respectively (**Figure 2**).  
128 This represents good overall performance with similar discrimination power across classes. Benign has  
129 higher sensitivity and lower specificity than the other two classes, representing a higher rate of false  
130 positives for Benign variants and a higher rate of false negatives for both classes of pathogenic variants.

131

### 132 *External Validation*

133 To assess the model's performance on external data sources, we collected an external Validation  
134 set containing 261 Recessive and 255 Dominant pathogenic missense variants from ClinVar and 1,010  
135 Benign missense variants from the Japan Whole Genome Aggregation panel v.1 (GEM)<sup>42</sup>, in addition to  
136 the internal Train/Test set. Performance on this external Validation set was similar to performance  
137 measured on the Test set, with AUROC=0.99/0.99/0.96 (SD=2.7 x 10<sup>-3</sup>/1.8 x 10<sup>-3</sup>/6.9 x 10<sup>-3</sup>), sensitivity  
138 0.85/0.87/0.93 (SD 1.8 x 10<sup>-2</sup>/2.8 x 10<sup>-2</sup>/1.7 x 10<sup>-2</sup>), and specificity 0.98/0.99/0.86 (SD 7.4 x 10<sup>-3</sup>/4.8 x 10<sup>-3</sup>/  
139 3/1.5 x 10<sup>-2</sup>) for Recessive/Dominant/Benign classes (**Figure 2**). This suggests that the model is not  
140 overfitting the data sources used for training and testing (ExoVar and gnomAD), which would be  
141 indicated by a significant drop in performance between the internal blind Test set and external validation.  
142 Indeed, the model appears to perform better on the external validation set. This may reflect the fact that  
143 the ClinVar datasets used for external validation contain more confident annotations and less noise than  
144 the ExoVar datasets used for training and testing.

145 To expand on this observation, we grouped variants by ClinVar review status (level of evidence  
146 for pathogenicity) and assessed how the confidence of variant annotations affects the sensitivity of our  
147 predictions. We found that sensitivity improved with higher review status: sensitivity for the  
148 Recessive/Dominant classes was 0.58/0.49 (SD 0.03/0.00) for 0-star review status, 0.68/0.59 (SD  
149 0.04/0.00) for 1-star review status, and 0.86/0.89 (SD 0.04/0.00) for 2-star or higher review status  
150 (**Supplementary Figure 2**). This is as expected if lower-confidence variants are less likely to be truly  
151 pathogenic. In this case, an accurate predictor would predict a smaller fraction of 0-star variants to be  
152 pathogenic, because the fraction of those variants that are truly pathogenic is smaller.

153 We also tested the inheritance prediction model on variants unique to a single ancestry group  
154 (European American, African American, or Hispanic American) to evaluate whether performance is  
155 consistent across ancestries. We found that sensitivity was uniformly high across all three ancestries, with  
156 no specific ancestry having substantially higher power (**Supplementary Figure 3, 4 and 5**). We also

157 found that ancestry-specific variants across all three ancestries showed the same trend as the full dataset,  
158 with sensitivity improving in higher confidence annotations. This demonstrates that MOI-Pred is not  
159 primarily powered to detect variants observed in Europeans, but has similar performance regardless of  
160 ancestry.

161

### 162 *Model interpretation*

163 Examining the importance of different features in the model shows the union of functional,  
164 evolutionary and combined information that are driving the inheritance prediction. One functional feature  
165 (AD.rank with 23.8%), two combined features (MutPred and MCAP with 14.2% and 13.6%, respectively)  
166 and two evolutionary features (OE and FATHMM with 11.2% and 11% respectively) carry 73.8% of the  
167 models' weight (**Figure 3. A**).

168 These feature weights represent the overall importance of features to the three-way classifier. To  
169 examine which features are important to identify each individual class, we trained three two-way  
170 classifiers to distinguish Dominant from Benign, Recessive from Benign, and Dominant from Recessive.  
171 Both Benign-Pathogenic binary prediction models (Benign-Dominant and Benign-Recessive) are  
172 dominated by features carrying combined functional and evolutionary information, namely MCAP,  
173 MutPred and VEST3, in addition to FATHMM which primarily carries evolutionary information (**Figure**  
174 **3. B, Supplementary Figure 6 and 7**). In contrast, the Dominant-Recessive prediction is mainly driven  
175 by gene-level features carrying either functional or evolutionary information like AD.rank and O/E  
176 (**Figure 3. B, Supplementary Figure 8**).

177

### 178 *Clinical validation using EHR*

179 To test the performance of the model on real-world clinical data, we collected a total of 1,845,623  
180 variants present in patients from the BioMe biobank<sup>43</sup>. Of these, 56,706 were missense variants present in  
181 ClinVar (2,301 Pathogenic, 9,865 Benign, 35,629 Uncertain significance and 8,911 Conflicting  
182 interpretation), and 19,134 remain after restricting to 2-star or higher in ClinVar review status (1,047

183 Pathogenic, 6,303 Benign and 11,784 Uncertain significance) (**Supplementary Table 3**). The model used  
184 to predict all variants shows good performance in the Train/Test and Validation sets (**Supplementary**  
185 **Table 4**). For each variant, we marked each patient as positive if the EHR included a diagnosis reported  
186 for the variant in ClinVar, and negative otherwise. We then used a Cochran-Mantel-Haenszel (CMH)  
187 stratified contingency test to assess the association between homozygous or heterozygous carriers of  
188 ClinVar-annotated variants and actual diagnoses, stratified by disease. An association between carrier  
189 status and disease status indicates that the variants being tested are, in aggregate, associated with disease  
190 with the specified mode of inheritance. By separating variants that receive different predictions from our  
191 model, we can test whether our model's prediction is actually predictive of carrier disease status in a real  
192 clinical population.

193 The contingency table analysis showed that our model is highly predictive, with all ClinVar  
194 categories showing associations in the expected directions. We found that a Recessive prediction  
195 significantly increases the association between homozygous carrier status and disease status for all  
196 ClinVar Pathogenic (OR=4.30 [95% CI=4.07 to 4.55] and OR=1.07 [95% CI=1.04 to 1.09]), Uncertain  
197 Significance (OR=5.45 [95% CI=5.13 to 5.77] and OR=0.31 [95% CI=0.30 to 0.32]) and Conflicting  
198 Interpretation (OR=4.11 [95% CI=3.94 to 4.28] and OR=1.11 [95% CI=1.09 to 1.13]) annotations. A  
199 Dominant prediction significantly increases the association between homozygous or heterozygous carrier  
200 status and disease status for ClinVar Pathogenic (Odds ratio (OR)=1.98 for MOI-Pred's prediction [95%  
201 confidence interval (CI)=1.96 to 2.00] and OR=1.56 [95% CI=1.55 to 1.57] for all other variants) and  
202 Uncertain Significance (OR=1.40 [95% CI=1.39 to 1.41] and OR=0.87 [95% CI=0.87 to 0.87])  
203 annotations. And as expected, a Benign prediction significantly decreases the association between  
204 homozygous or heterozygous carrier status and disease status for ClinVar Pathogenic (OR=1.23 [95%  
205 CI=1.22 to 1.24] and OR=2.97 [95% CI=2.94 to 2.99]) and Uncertain Significance (OR=0.87 [95%  
206 CI=0.87 to 0.88] and OR=1.02 [95% CI=1.01 to 1.02]) annotations (**Figure 4, Supplementary Table 5-**  
207 **7**). Restricting to ClinVar variants with 2-star or higher review status showed similar results  
208 (**Supplementary Figure 9, Supplementary Table 8-10**). Notably, we observed a particularly strong



209 protective association of variants on disease that are not predicted recessive for “Uncertain Significance”  
210 variants (**Figure 4C**).

211 To compare MOI-Pred with a previously developed mode of inheritance prediction tool  
212 (MAPPIN), we also performed the same EHR-based clinical validation analyses using MAPPIN  
213 predictions (**Supplementary Figure 10, Supplementary Table 11-13**). MAPPIN shows weaker  
214 enrichment for recessive association with disease of ClinVar Pathogenic predicted recessive (OR=3.61  
215 [95% CI=3.41 to 3.80] for MAPPIN vs. OR=4.31 [95% CI=4.07 to 4.55] for MOI-Pred) and no  
216 enrichment for recessive association with disease of ClinVar Uncertain Significance and Conflicting  
217 Interpretation variants (OR=0.35 [95% CI=0.33 to 0.36] for MAPPIN vs. OR=5.45 [95% CI=5.13 to  
218 5.77] for MOI-Pred and OR=1.15 [95% CI=1.11 to 1.18] for MAPPIN vs. OR=4.11 [95% CI=3.94 to  
219 4.28] for MOI-Pred, respectively) (**Supplementary Figure 10, Supplementary Table 11**). As expected,  
220 MAPPIN shows similar or stronger enrichment for dominant association with disease for various ClinVar  
221 classes (**Supplementary Figure 10, Supplementary Table 12**).

222

### 223 *Discovery of individual variants*

224 To test the utility of MOI-Pred for clinical assessment of individual variants, we performed single  
225 variant association tests in the BioMe biobank and identified 18 variants showing significant associations  
226 with a single phenotype (p-value corrected for 455 recessive association tests= $1.09 \times 10^{-4}$ ; p-value  
227 corrected for 455 recessive association tests for 6,382 dominant association tests= $7.83 \times 10^{-6}$ ) (**Table 1**  
228 **and Supplementary Table 14-17**). Three variants were found to have significant recessive associations  
229 with disease. Interestingly, none of these are labelled as Pathogenic in ClinVar as two are labelled Benign  
230 and one is labelled Conflicting Interpretation of Pathogenicity. Moreover, 15 variants showed dominant  
231 association with disease, 12 of which do not correspond with their clinical annotation using  
232 ClinVar/OMIM, showing the potential utility of MOI-Pred for discovery of novel associations with  
233 disease (**Table 1**).

234

## 235 Discussion

236 Here we present MOI-Pred, a computational tool that jointly predicts pathogenicity and mode of  
237 inheritance for missense variants. Our tool uses a random forest classifier trained on known variants to  
238 combine multiple sources of annotation into a single prediction. Compared to other existing methods,  
239 MOI-Pred benefits from several key innovations. First and foremost, where most methods produce a  
240 binary prediction of pathogenic or benign, our method produces a three-way prediction, classifying each  
241 variant as pathogenic for AR disease, pathogenic for AD disease, or benign. In particular, while many  
242 existing methods perform well at predicting pathogenic variants in AD disease (e.g. O/E<sup>41</sup>, CADD<sup>44</sup>,  
243 phyloP<sup>45</sup>, etc.), MOI-Pred specifically targets the problem of discriminating AR pathogenic variants from  
244 benign, a long-lasting issue in genetics unattended by current annotation pipelines. Only one pre-existing  
245 method makes three-class predictions, MAPPIN<sup>38</sup>. MOI-Pred performs substantially better than MAPPIN  
246 at identifying variants associated with recessive-acting diseases in both prediction performance  
247 (Precision=0.79 on the training set for MAPPIN recessive predictions based on Gosalia et al. 2017<sup>38</sup>) and  
248 when testing on real-world clinical data in the current study.

249 Second, MOI-Pred combines evolutionary and functional annotations on both the gene and  
250 variant level to produce a combined variant-level prediction. This gives an important advantage in  
251 predicting mode of inheritance, since different annotation sources are known to have different error  
252 profiles. In particular, it has recently been shown that evolutionary scores are primarily sensitive to  
253 heterozygote effects, making these methods very likely to misclassify AR pathogenic variants as  
254 benign<sup>34,35</sup>. Most predictors of pathogenicity rely primarily on these scores, and therefore may be  
255 systematically insensitive to AR pathogenic variants. By combining multiple different scores in a random  
256 forest framework, MOI-Pred is able to learn which scores are most sensitive to each mode of inheritance.  
257 For example, O/E, which relies exclusively on evolutionary constraint, is very likely to confuse AR with  
258 benign, while MutPred, which incorporates biophysical properties of proteins<sup>46,47</sup>, is more likely to  
259 categorize AR variants as pathogenic. Accordingly, in our method, O/E is an important feature separating  
260 AD from benign, while MutPred is an important feature separating AR from benign.

261 Third, MOI-Pred is trained with a population-derived list of benign variants, and validated on  
262 novel population-derived benign variants unknown to its constituent scores. Because the most difficult  
263 classification task is distinguishing AR from benign, the choice of benign training data is vitally  
264 important. Since we use clinically validated pathogenic variants for training, it is tempting to use  
265 clinically validated benign variants as well, but this can bias the training set. These were suspected being  
266 pathogenic at some point and therefore may have features that are not typical of benign variants<sup>48</sup>. The  
267 ideal source of benign variants should be found at sufficiently high frequency in a healthy human  
268 population<sup>13,49</sup>. We used frequency-matched variants from a large population database (gnomAD) as  
269 presumed benign controls in our training set, an approach that has been used by previous methods such as  
270 CADD<sup>44</sup> and VEST3<sup>50,51</sup>. However, using these variants introduces an additional problem: population  
271 genetics scores used as components in our prediction model are often themselves derived from the same  
272 populations, introducing bias and the risk of overfitting<sup>52</sup>. We addressed this problem by using common  
273 variants from a recently published cohort of healthy Japanese adults as a validation set. At the time of  
274 analysis, this population had not yet been incorporated into widely used population databases, and all  
275 genetics scores were therefore naïve to it. Our classifier performed better on these population-derived  
276 benign variants than an equivalent classifier trained on clinically validated benign variants, and also  
277 performed well on clinically validated benign variants.

278 Finally, we validated our method by using it to predict disease case-control status in EHR data  
279 from the BioMe biobank<sup>43</sup>. We demonstrated that our predictions of mode of inheritance are significantly  
280 associated with the likelihood of carriers developing Mendelian disease in a real-world clinical setting.  
281 This is true for variants annotated as pathogenic, variants of unknown significance, as well as novel and  
282 ancestry-specific variants. This analysis also revealed that some variants with a Benign prediction appear  
283 to protect against disease, particularly in variants with “Uncertain significance” (Figure 4C). Since the  
284 “Uncertain significance” ClinVar class necessarily contains variants without clear evidence for or against  
285 pathogenicity, it is possible that disease modifier variants or variants with protective effects in  
286 heterozygous or homozygous form (underdominance or overdominance) may frequently be classified as

287 “Uncertain significance.” Similarly, these variants lack normal signatures of natural selection and so may  
288 be likely to receive a Benign prediction in MOI-Pred. In general, the properties of these variants are not  
289 well understood, including whether they can be predicted by computational methods, and further  
290 investigation is warranted<sup>53</sup>. We also found individual variants where the prediction made by MOI-Pred  
291 differed from their clinical annotations using ClinVar/OMIM, and we verified using the same EHR  
292 database that both the pathogenicity and the mode of inheritance predicted by our method is likely to be  
293 correct. These analyses demonstrate the applicability of our method to real clinical data and decision-  
294 making particularly with respect to large-scale electronic health systems. Such clinical validation is only  
295 possible thanks to increasingly available EHR-linked biobanks, and we anticipate it being applied more  
296 broadly to variant prediction tools in the future.

297 Our method has several limitations and areas for future work. First, it remains uncertain whether  
298 the performance we observe in the test and validation sets will hold in real applications. Many existing  
299 tools have reported similarly high performance in their authors’ internal testing and lower performance in  
300 unbiased replication analyses<sup>12</sup>. Many have also failed to find clinical utility despite numerically high  
301 performance<sup>54,55</sup>. Our EHR-based clinical validation suggests that results will hold<sup>56</sup> in real-world clinical  
302 data, but validation in other clinical datasets and by other groups is needed. Second, our three-way  
303 predictions, though more complete than typical binary predictions, do not completely account for all  
304 forms of mode of inheritance. Phenomena such as incomplete dominance, overdominance, and  
305 heterozygote advantage, all of which are well documented in human disease<sup>56-58</sup>, are unaccounted for in  
306 our simple recessive-dominant-benign classification. Likewise, mode of inheritance itself is far from the  
307 only refinement that can be added to variant effect predictions. The field would benefit enormously from  
308 methods to predict gain-of-function variants, disease suppressor variants, or uniparental imprinted  
309 variants, to name just a few. Third, there is room for innovation and improvement in the method. We used  
310 only a subset of applicable ML methods and available features. Furthermore, we focus only on missense  
311 variants, primarily because this is the largest class of variation for clinical variants and most applicable to  
312 mode of inheritance prediction. Most coding annotations are available for missense variants, while a

313 much smaller number are available for other forms of variation including synonymous, loss-of-function,  
314 non-coding, or multi-nucleotide variants. Ultimately, MOI-Pred is meant to be used in combination with  
315 other methods to form a holistic picture of the effects of variants. This is true for even the most widely-  
316 used prediction methods, which are rarely relied on individually. We believe that this method, together  
317 with MAPPIN and others, will enable variant function prediction to go beyond a binary prediction of  
318 pathogenicity so that the picture of variant effects formed by computational annotation begins to resemble  
319 the true complexity of actual phenotypes.

320

## 321 **Methods**

### 322 *Variant collection*

323 Missense variants from publicly available resources were used to generate all datasets. For the  
324 training set, pathogenic variants were obtained from ExoVar<sup>16</sup>. Presumed non-pathogenic variants were  
325 selected from the Genome Aggregation Database (gnomAD)<sup>41</sup> v2.1.1. GnomAD variants were chosen to  
326 match the allele frequency (AF) of pathogenic variants to within 0.1%, based on minor allele frequency in  
327 the entire gnomAD population; singletons were chosen to match variants not present in gnomAD. For the  
328 validation set, pathogenic variants with review status “reviewed by expert panel” were selected from  
329 ClinVar<sup>27</sup> (release June 2020), and presumed non-pathogenic variants were selected from GEM<sup>42</sup>, defined  
330 as variants with AF  $\geq$  1% in GEM and absent or singleton in gnomAD. Gene-level mode of inheritance  
331 information for pathogenic variants was obtained from OMIM<sup>26</sup> (release May 2020).

332

### 333 *Variant annotation*

334 Variants were characterized using functional and evolutionary information. ANNOVAR<sup>59</sup> was  
335 used to annotate variant-level features. We included all available features from ANNOVAR that could be  
336 applied to all or nearly all missense variants. This includes 15 features built on evolutionary information  
337 (e.g. phyloP<sup>45</sup>, FATHMM<sup>60</sup>, GERP<sup>61</sup>, PROVEAN<sup>62</sup>, etc.), 42 features built on both evolutionary and  
338 functional information (e.g. M-CAP<sup>63</sup>, CADD<sup>44</sup>, VEST3<sup>50</sup>, MutationTaster<sup>64</sup>, etc.) and 14 population

339 frequency features (e.g. cg69<sup>65</sup>, Kaviar<sup>66</sup>, GME<sup>67</sup>, etc.). We added to this, 7 gene-level features which  
340 were retrieved manually from their original sources. This includes 2 gene level features built on  
341 evolutionary information (OE score<sup>41</sup> and s\_het<sup>68</sup>), 4 gene level features built on functional information  
342 (Episcore<sup>69</sup>, AD rank<sup>70</sup>, StringAD and StringAR<sup>71</sup>) and 1 gene level feature combining the two  
343 annotations (HI<sup>72</sup>). The full list of features and their source of information can be found in  
344 **Supplementary Table 1.**

345

#### 346 *Data trimming and imputation*

347 Features with more than 60% missing values and/or high correlation (Pearson's  $r \geq 0.8$ ) in the  
348 training set were removed. In two correlated features, the one with higher mean absolute correlation  
349 across all features was removed. Variants with more than 60% missing values in the remaining set of  
350 features were removed from both the training and external validation sets. Missing values were imputed  
351 first on variant-level features. The resulting dataset was then used to impute gene-level features, ensuring  
352 low intra-gene variation in these annotations. A random forest-based algorithm (missForest v1.4<sup>73</sup>) was  
353 used for both imputations. The final dataset was comprised of 30 features on 5,872 and 1,526 variants  
354 from the training and external validation sets respectively.

355

#### 356 *Workflow to train inheritance prediction models*

357 A machine learning (ML) approach was used to develop mode of inheritance prediction models.  
358 To minimize sampling biases, 100 models were trained, tested and validated using random sets of  
359 variants. The workflow is described below for a single iteration. A random sample of 90% of available  
360 Dominant variants from the training set plus equal numbers of Recessive and Benign variants constituted  
361 a balanced Train set. The remaining variants from the training set were used to sample a balanced 10%  
362 Test set. The Validation set consisted of all Dominant variants available in the external validation dataset  
363 plus equal numbers of randomly sampled Recessive and Benign variants. Scaling and feature selection  
364 (using a wrapper random forest-based approach, recursive feature elimination) were performed on the

365 Train set using the caret package v6.0.84<sup>74</sup> available in R, then applied accordingly to the Test and  
366 Validation sets. A three-class (Recessive, Dominant, Benign) random forest algorithm<sup>75</sup> was then fitted to  
367 the Train set using 10-fold cross validation to optimize parameter tuning and limit overfitting. Three two-  
368 class random forest algorithms (Dominant vs. Recessive, Dominant vs. Benign, Recessive vs. Benign)  
369 were fitted in parallel for subsequent feature importance analyses. Mode of inheritance label was then  
370 predicted on the Test and Validation sets to compute performance metrics. This entire procedure was  
371 repeated 100 times; reported performance statistics (see Results) correspond to the mean and standard  
372 deviation (SD) across all 100 runs.

373 The AUROC was calculated using the pROC package v1.14.0<sup>76</sup> available in R v3.5.3<sup>77</sup>. To obtain  
374 a per-class discrimination metric the remaining two labels were treated as negative classes. Accuracy,  
375 sensitivity, specificity and positive/negative predictive values (PPV/NPV) as well as the ML framework  
376 was implemented using the caret package.

377 Three-way variant-level mode of inheritance predictions (pathogenic for autosomal recessive  
378 (AR) disease, pathogenic for autosomal dominant (AD) disease, or benign) for all possible missense  
379 variants in the human genome build hg38 are available at <https://github.com/rondolab/MOI-Pred/>.

380

### 381 *Clinical validation of inheritance prediction models in electronic health records*

382 A single three-class random forest algorithm was fitted, tested and validated as described above  
383 to predict mode of inheritance in genotype data from 29,981 individuals in the BioMe biobank<sup>43</sup>. BioMe is  
384 a multiethnic, EHR-linked, clinical care biobank of more than 60,000 samples from individuals recruited  
385 at the Mount Sinai Health System between 2007 and 2015. Participants were genotyped using the  
386 Illumina Global Screening Array, imputation was performed using the 1000 Genomes Phase 3 reference  
387 panel, and genetic ancestry was determined through k-means clustering of principal components.  
388 Longitudinal biomedical traits including diagnostic codes and laboratory test results were obtained mainly  
389 through ambulatory care practices resulting in a high median number of encounters per patient<sup>78</sup>. Only  
390 variants present in ClinVar (release June 2020) were considered for posterior analyses. ClinVar's

391 phenotype information was mapped to 456 categories of International Classification of Disease 10 (ICD-  
392 10) diagnostic codes using information from the Systematized Nomenclature of Medicine Clinical Terms  
393 (SNOMED-CT)<sup>79</sup> and Orphanet<sup>80</sup>.

394 Contingency table analyses were performed to test recessive, dominant and benign models on  
395 variants predicted with the corresponding mode of inheritance. Each table evaluates a subset of variants  
396 having the same inheritance prediction, same clinical significance label in ClinVar, and mapped to the  
397 same set of billing codes. An individual was considered “affected” if diagnosed with an ICD-10 code  
398 mapped to the above-mentioned subset of variants. Likewise, an individual was considered a “carrier” if  
399 homozygous for the pathogenic allele for the recessive model, homozygous for the pathogenic allele or  
400 heterozygous for the dominant model, and homozygous for the pathogenic allele or heterozygous for the  
401 benign model. An individual was considered a ‘non-carrier’ if heterozygous for the recessive model,  
402 homozygous for the non-pathogenic allele for the dominant model, and homozygous for the non-  
403 pathogenic allele for the benign model. Each 2x2 table of carrier status vs. phenotype case/control status  
404 was restricted to individuals from independent ancestries and weighted by the prevalence of the  
405 corresponding set of ICD-10 codes in each of the ancestries in the BioMe EHR data. The analysis was  
406 repeated twice, once for variants with predicted mode of inheritance corresponding to the model (e.g.  
407 variants predicted Recessive when evaluating on the recessive model) and once for all variants not  
408 predicted in the respective model (e.g. variants predicted Benign and Dominant when evaluating on the  
409 recessive model). Furthermore, a secondary analysis restricting to variants with ClinVar review status of  
410 two stars or higher was performed.

411 A CMH test was applied to the ancestry-specific tables from the same predicted mode of  
412 inheritance and clinical significance to obtain OR, 95% CI and corresponding p-values. The results were  
413 then aggregated across ancestries using an inverse variance meta-analysis. A Q-test was performed to  
414 evaluate heterogeneity between ORs of variants predicted and not predicted in the respective models. The  
415 stats package v3.6.2<sup>77</sup> was used to perform the CMH test and the metafor package v3.0.2<sup>81</sup> was used for  
416 the Q-test.



417  
418  
419  
420  
421  
422  
423  
424  
425  
426  
427  
428  
429  
430  
431  
432  
433  
434  
435  
436  
437  
438  
439  
440  
441  
442

*Single nucleotide variant association discovery*

A total of 433 groups of ICD-10 codes were tested for dominant and recessive association with 6,382 variants present in ClinVar, having an ICD-10 code mapping and MOI-Pred prediction. The analysis was performed in individual ancestries (European-American, African-American, Hispanic-American and other ancestries) and meta-analyzed using plink v1.9<sup>82</sup>. Whole exome sequencing data and EHR from the BioMe biobank were used in the analysis; 10 principal components were used as covariates to account for population stratification.

443 References

- 444 1. Yang, Y. *et al.* Clinical Whole-Exome Sequencing for the Diagnosis of Mendelian Disorders. *New*  
445 *England Journal of Medicine* **369**, 1502-1511 (2013).
- 446 2. Posey, J.E. *et al.* Resolution of Disease Phenotypes Resulting from Multilocus Genomic Variation.  
447 *New England Journal of Medicine* **376**, 21-31 (2016).
- 448 3. Adams, D.R. & Eng, C.M. Next-Generation Sequencing to Diagnose Suspected Genetic Disorders.  
449 *The New England Journal of Medicine* **379**, 1353-1362 (2018).
- 450 4. Monies, D. *et al.* Lessons Learned from Large-Scale, First-Tier Clinical Exome Sequencing in a  
451 Highly Consanguineous Population. *The American Journal of Human Genetics* **104**, 1182-1201  
452 (2019).
- 453 5. Akawi, N. *et al.* Discovery of four recessive developmental disorders using probabilistic genotype  
454 and phenotype matching among 4,125 families. *Nature Genetics* **47**, 1363-1369 (2015).
- 455 6. Turro, E. *et al.* Whole-genome sequencing of patients with rare diseases in a national health  
456 system. *Nature* **583**, 96-102 (2020).
- 457 7. Van Hout, C.V. *et al.* Exome sequencing and characterization of 49,960 individuals in the UK  
458 Biobank. *Nature* **586**, 749-756 (2020).
- 459 8. Do, R. *et al.* Exome sequencing identifies rare LDLR and APOA5 alleles conferring risk for  
460 myocardial infarction. *Nature* **518**, 102-106 (2015).
- 461 9. Spreafico, R., Soriaga, L.B., Grosse, J., Virgin, H.W. & Telenti, A. Advances in Genomics for Drug  
462 Development. *Genes* **11**(2020).
- 463 10. Plenge, R.M., Scolnick, E.M. & Altshuler, D. Validating therapeutic targets through human  
464 genetics. *Nature Reviews Drug Discovery* **12**, 581-594 (2013).
- 465 11. Dong, C. *et al.* Comparison and integration of deleteriousness prediction methods for  
466 nonsynonymous SNVs in whole exome sequencing studies. *Human Molecular Genetics* **24**, 2125-  
467 2137 (2015).
- 468 12. Li, J. *et al.* Performance evaluation of pathogenicity-computation methods for missense variants.  
469 *Nucleic acids research* **46**, 7793-7804 (2018).
- 470 13. Richards, S. *et al.* Standards and guidelines for the interpretation of sequence variants: a joint  
471 consensus recommendation of the American College of Medical Genetics and Genomics and the  
472 Association for Molecular Pathology. *Genetics in Medicine* **17**, 405-423 (2015).
- 473 14. Ioannidis, N.M. *et al.* REVEL: An Ensemble Method for Predicting the Pathogenicity of Rare  
474 Missense Variants. *The American Journal of Human Genetics* **99**, 877-885 (2016).
- 475 15. Alirezaie, N., Kernohan, K.D., Hartley, T., Majewski, J. & Hocking, T.D. ClinPred: Prediction Tool  
476 to Identify Disease-Relevant Nonsynonymous Single-Nucleotide Variants. *The American Journal*  
477 *of Human Genetics* **103**, 474-483 (2018).
- 478 16. Li, M.-X. *et al.* Predicting Mendelian Disease-Causing Non-Synonymous Single Nucleotide  
479 Variants in Exome Sequencing Studies. *PLOS Genetics* **9**, e1003143 (2013).
- 480 17. Zhang, X. *et al.* Disease-specific variant pathogenicity prediction significantly improves variant  
481 interpretation in inherited cardiac conditions. *Genetics in Medicine* **23**, 69-79 (2021).
- 482 18. Lappalainen, T. & MacArthur Daniel, G. From variant to function in human disease genetics.  
483 *Science* **373**, 1464-1468 (2021).
- 484 19. Claustres, M. *et al.* Recommendations for reporting results of diagnostic genetic testing  
485 (biochemical, cytogenetic and molecular genetic). *European Journal of Human Genetics* **22**, 160-  
486 170 (2014).
- 487 20. MacArthur, D.G. *et al.* Guidelines for investigating causality of sequence variants in human  
488 disease. *Nature* **508**, 469-476 (2014).

- 489 21. Eldomery, M.K. *et al.* Lessons learned from additional research analyses of unsolved clinical  
490 exome cases. *Genome Medicine* **9**, 26 (2017).
- 491 22. Ewans, L.J. *et al.* Whole-exome sequencing reanalysis at 12 months boosts diagnosis and is cost-  
492 effective when applied early in Mendelian disorders. *Genetics in Medicine* **20**, 1564-1574 (2018).
- 493 23. Lee, H. *et al.* Clinical Exome Sequencing for Genetic Identification of Rare Mendelian Disorders.  
494 *JAMA* **312**, 1880-1887 (2014).
- 495 24. Retterer, K. *et al.* Clinical application of whole-exome sequencing across clinical indications.  
496 *Genetics in Medicine* **18**, 696-704 (2016).
- 497 25. Chong, Jessica X. *et al.* The Genetic Basis of Mendelian Phenotypes: Discoveries, Challenges, and  
498 Opportunities. *The American Journal of Human Genetics* **97**, 199-215 (2015).
- 499 26. Online Mendelian Inheritance in Man, O.M.-N.I.o.G.M., Johns Hopkins University (Baltimore,  
500 MD), May 2020. World Wide Web URL: <https://omim.org/>.
- 501 27. Landrum, M.J. *et al.* ClinVar: improving access to variant interpretations and supporting  
502 evidence. *Nucleic Acids Res* **46**, D1062-d1067 (2018).
- 503 28. Furney, S.J., Albà, M.M. & López-Bigas, N. Differences in the evolutionary history of disease  
504 genes affected by dominant or recessive mutations. *BMC Genomics* **7**, 165 (2006).
- 505 29. Jimenez-Sanchez, G., Childs, B. & Valle, D. Human disease genes. *Nature* **409**, 853-855 (2001).
- 506 30. Kondrashov, F.A. & Koonin, E.V. A common framework for understanding the origin of genetic  
507 dominance and evolutionary fates of gene duplications. *Trends in Genetics* **20**, 287-290 (2004).
- 508 31. López-Bigas, N., Blencowe, B.J. & Ouzounis, C.A. Highly consistent patterns for inherited human  
509 diseases at the molecular level. *Bioinformatics* **22**, 269-277 (2006).
- 510 32. Blekhman, R. *et al.* Natural selection on genes that underlie human disease susceptibility. *Curr*  
511 *Biol* **18**, 883-9 (2008).
- 512 33. Rapaport, F. *et al.* Negative selection on human genes underlying inborn errors depends on  
513 disease outcome and both the mode and mechanism of inheritance. *Proceedings of the National*  
514 *Academy of Sciences* **118**, e2001248118 (2021).
- 515 34. Fuller, Z.L., Berg, J.J., Mostafavi, H., Sella, G. & Przeworski, M. Measuring intolerance to  
516 mutation in human genetics. *Nature Genetics* **51**, 772-776 (2019).
- 517 35. Balick, D.J., Jordan, D.M., Sunyaev, S. & Do, R. Overcoming constraints on the detection of  
518 recessive selection in human genes from population frequency data. *bioRxiv*, 2021.05.06.443024  
519 (2021).
- 520 36. Antonarakis, S.E. Carrier screening for recessive disorders. *Nature Reviews Genetics* **20**, 549-561  
521 (2019).
- 522 37. Furney, S.J., Albà, M.M. & López-Bigas, N. Differences in the evolutionary history of disease  
523 genes affected by dominant or recessive mutations. *BMC Genomics* **7**, 165 (2006).
- 524 38. Gosalia, N., Economides, A.N., Dewey, F.E. & Balasubramanian, S. MAPPIN: a method for  
525 annotating, predicting pathogenicity and mode of inheritance for nonsynonymous variants.  
526 *Nucleic Acids Research* **45**, 10393-10402 (2017).
- 527 39. Quinodoz, M. *et al.* DOMINO: Using Machine Learning to Predict Genes Associated with  
528 Dominant Disorders. *The American Journal of Human Genetics* **101**, 623-629 (2017).
- 529 40. Stenson, P.D. *et al.* Human Gene Mutation Database (HGMD): 2003 update. *Hum Mutat* **21**, 577-  
530 81 (2003).
- 531 41. Karczewski, K.J. *et al.* The mutational constraint spectrum quantified from variation in 141,456  
532 humans. *Nature* **581**, 434-443 (2020).
- 533 42. [https://togovar.biosciencedbc.jp/doc/datasets/gem\\_j\\_wga](https://togovar.biosciencedbc.jp/doc/datasets/gem_j_wga)., G.J.W.G.A.G.-J.W.P.J.G.M.a.J.P.G.-  
534 J.A.f.
- 535 43. BioMeTM BioBank Program. <https://icahn.mssm.edu/research/ipm/programs/biome-biobank>.  
536 Accessed June.

- 537 44. Rentzsch, P., Witten, D., Cooper, G.M., Shendure, J. & Kircher, M. CADD: predicting the  
538 deleteriousness of variants throughout the human genome. *Nucleic Acids Res* **47**, D886-d894  
539 (2019).
- 540 45. Pollard, K.S., Hubisz, M.J., Rosenbloom, K.R. & Siepel, A. Detection of nonneutral substitution  
541 rates on mammalian phylogenies. *Genome Res* **20**, 110-21 (2010).
- 542 46. Li, B. *et al.* Automated inference of molecular mechanisms of disease from amino acid  
543 substitutions. *Bioinformatics* **25**, 2744-50 (2009).
- 544 47. Pejaver, V. *et al.* Inferring the molecular and phenotypic impact of amino acid variants with  
545 MutPred2. *Nat Commun* **11**, 5918 (2020).
- 546 48. Shah, N. *et al.* Identification of Misclassified ClinVar Variants via Disease Population Prevalence.  
547 *American journal of human genetics* **102**, 609-619 (2018).
- 548 49. Ghosh, R. *et al.* Updated recommendation for the benign stand-alone ACMG/AMP criterion.  
549 *Human mutation* **39**, 1525-1530 (2018).
- 550 50. Carter, H., Douville, C., Stenson, P.D., Cooper, D.N. & Karchin, R. Identifying Mendelian disease  
551 genes with the variant effect scoring tool. *BMC Genomics* **14 Suppl 3**, S3 (2013).
- 552 51. Carter, H., Douville, C., Stenson, P.D., Cooper, D.N. & Karchin, R. Identifying Mendelian disease  
553 genes with the variant effect scoring tool. *BMC Genomics* **14 Suppl 3**, S3 (2013).
- 554 52. Grimm, D.G. *et al.* The evaluation of tools used to predict the impact of missense variants is  
555 hindered by two types of circularity. *Hum Mutat* **36**, 513-23 (2015).
- 556 53. Rahit, K. & Tarailo-Graovac, M. Genetic Modifiers and Rare Mendelian Disease. *Genes (Basel)*  
557 **11**(2020).
- 558 54. Ghosh, R., Oak, N. & Plon, S.E. Evaluation of in silico algorithms for use with ACMG/AMP clinical  
559 variant interpretation guidelines. *Genome Biol* **18**, 225 (2017).
- 560 55. Mahmood, K. *et al.* Variant effect prediction tools assessed using independent, functional assay-  
561 based datasets: implications for discovery and diagnostics. *Hum Genomics* **11**, 10 (2017).
- 562 56. Wexler, N.S. *et al.* Homozygotes for Huntington's disease. *Nature* **326**, 194-7 (1987).
- 563 57. Hughes, A.L. & Nei, M. Pattern of nucleotide substitution at major histocompatibility complex  
564 class I loci reveals overdominant selection. *Nature* **335**, 167-170 (1988).
- 565 58. Schroeder, S.A., Gaughan, D.M. & Swift, M. Protection against bronchial asthma by CFTR  $\Delta F508$   
566 mutation: A heterozygote advantage in cystic fibrosis. *Nature Medicine* **1**, 703-705 (1995).
- 567 59. Wang, K., Li, M. & Hakonarson, H. ANNOVAR: functional annotation of genetic variants from  
568 high-throughput sequencing data. *Nucleic Acids Research* **38**, e164-e164 (2010).
- 569 60. Shihab, H.A. *et al.* Predicting the Functional, Molecular, and Phenotypic Consequences of Amino  
570 Acid Substitutions using Hidden Markov Models. *Human Mutation* **34**, 57-65 (2013).
- 571 61. Davydov, E.V. *et al.* Identifying a High Fraction of the Human Genome to be under Selective  
572 Constraint Using GERP++. *PLoS Computational Biology* **6**, e1001025 (2010).
- 573 62. Choi, Y., Sims, G.E., Murphy, S., Miller, J.R. & Chan, A.P. Predicting the functional effect of amino  
574 acid substitutions and indels. *PLoS One* **7**, e46688 (2012).
- 575 63. Jagadeesh, K.A. *et al.* M-CAP eliminates a majority of variants of uncertain significance in clinical  
576 exomes at high sensitivity. *Nature Genetics* **48**, 1581-1586 (2016).
- 577 64. Schwarz, J.M., Cooper, D.N., Schuelke, M. & Seelow, D. MutationTaster2: mutation prediction  
578 for the deep-sequencing age. *Nat Methods* **11**, 361-2 (2014).
- 579 65. Drmanac, R. *et al.* Human Genome Sequencing Using Unchained Base Reads on Self-Assembling  
580 DNA Nanoarrays. *Science* **327**, 78 (2010).
- 581 66. Glusman, G., Caballero, J., Mauldin, D.E., Hood, L. & Roach, J.C. Kaviar: an accessible system for  
582 testing SNV novelty. *Bioinformatics* **27**, 3216-7 (2011).
- 583 67. Scott, E.M. *et al.* Characterization of Greater Middle Eastern genetic variation for enhanced  
584 disease gene discovery. *Nature genetics* **48**, 1071-1076 (2016).

- 585 68. Cassa, C.A. *et al.* Estimating the selective effects of heterozygous protein-truncating variants  
586 from human exome data. *Nature Genetics* **49**, 806-810 (2017).
- 587 69. Han, X. *et al.* Distinct epigenomic patterns are associated with haploinsufficiency and predict risk  
588 genes of developmental disorders. *Nature Communications* **9**, 2138 (2018).
- 589 70. Hsu, J.S. *et al.* Inheritance-mode specific pathogenicity prioritization (ISPP) for human protein  
590 coding genes. *Bioinformatics* **32**, 3065-3071 (2016).
- 591 71. Szklarczyk, D. *et al.* STRING v11: protein-protein association networks with increased coverage,  
592 supporting functional discovery in genome-wide experimental datasets. *Nucleic Acids Res* **47**,  
593 D607-d613 (2019).
- 594 72. Huang, N., Lee, I., Marcotte, E.M. & Hurler, M.E. Characterising and Predicting  
595 Haploinsufficiency in the Human Genome. *PLOS Genetics* **6**, e1001154 (2010).
- 596 73. Stekhoven, D.J. & Bühlmann, P. MissForest—non-parametric missing value imputation for  
597 mixed-type data. *Bioinformatics* **28**, 112-118 (2012).
- 598 74. Kuhn, M. Building Predictive Models in R Using the caret Package. *Journal Of Statistical Software*  
599 **28**(2008).
- 600 75. Liaw, A. & Wiener, M. Classification and Regression by randomForest. *R News* **2**, 18-22 (2002).
- 601 76. Robin, X. *et al.* pROC: an open-source package for R and S+ to analyze and compare ROC curves.  
602 *BMC Bioinformatics* **12**(2011).
- 603 77. R Core Team. R: A language and environment for statistical computing. *R Foundation for*  
604 *Statistical Computing, Vienna, Austria.* (2019).
- 605 78. Tayo, B.O. *et al.* Genetic Background of Patients from a University Medical Center in Manhattan:  
606 Implications for Personalized Medicine. *PLOS ONE* **6**, e19166 (2011).
- 607 79. International Health Terminology Standards Development Organisation. SNOMED CT Starter  
608 Guide, Accessed June 2020.  
609 <https://confluence.ihtsdotools.org/display/DOCSTART/SNOMED+CT+Starter+Guide>.
- 610 80. Pavan, S. *et al.* Clinical Practice Guidelines for Rare Diseases: The Orphanet Database. *PLoS One*  
611 **12**, e0170365 (2017).
- 612 81. Viechtbauer, W. Conducting Meta-Analyses in R with the metafor Package. *2010* **36**, 48 (2010).
- 613 82. Chang, C.C. *et al.* Second-generation PLINK: rising to the challenge of larger and richer datasets.  
614 *GigaScience* **4**(2015).

615

616

617

618

619

620

621

622

623

624 **Author Contributions:** Dr. Do, Dr. Jordan and Mr. Petrazzini had full access to all of the data in the  
625 study and take responsibility for the integrity of the data and accuracy of the data analysis.

626

627 *Concept and design:* Petrazzini, Jordan, Do.

628 *Acquisition, analysis, or interpretation of the data:* All authors.

629 *Drafting of the manuscript:* Petrazzini, Balick, Forrest, Rocheleau, Jordan and Do.

630 *Critical revision of the manuscript for important intellectual concept:* All authors.

631 *Statistical analysis:* Petrazzini, Rocheleau, Jordan, Do.

632 *Obtained funding:* Do.

633 *Administrative, technical, or material support:* Cho, Do.

634 *Supervision:* Jordan and Do.

635

636 **Conflict of Interest Disclosures:** Dr. Do reported receiving grants from AstraZeneca, grants and non-  
637 financial support from Goldfinch Bio, being a scientific co-founder, consultant and equity holder for  
638 Pensieve Health, and being a consultant for Variant Bio.

639

640 **Funding/Support:** Mr. Forrest is supported by the National Institute of General Medical Sciences of the  
641 National Institutes of Health (NIH) (T32-GM007280). Dr. Do is supported by the National Institute of  
642 General Medical Sciences of the NIH (R35-GM124836) and the National Heart, Lung, and Blood  
643 Institute of the NIH (R01-HL139865 and R01-HL155915).

644

645 **Disclaimer:** The content is solely the responsibility of the authors and does not necessarily represent the  
646 official views of the National Institutes of Health.

647

648 **Data sharing statement:** Not applicable.

649

650 **Figure 1.** Study design and machine learning workflow.

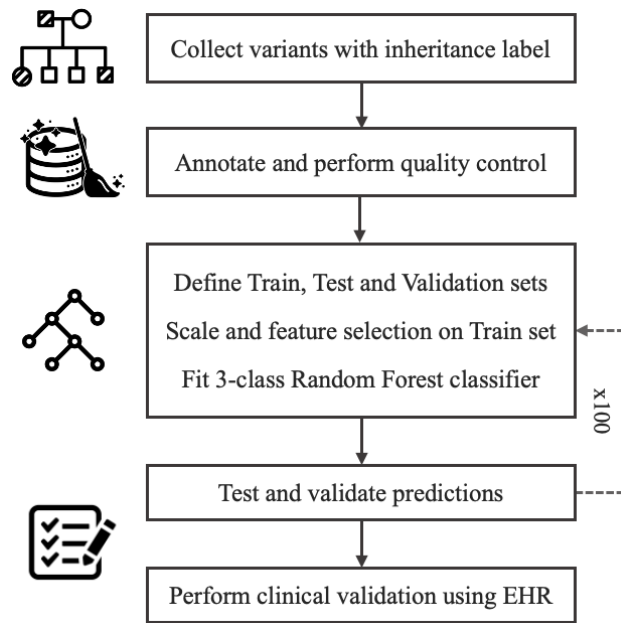

651

652

653 Train and Test sets correspond to the 90% and 10% balanced datasets, built from ExoVar and gnomAD

654 variants, used for training and testing respectively. Validation set corresponds to the balanced dataset,

655 built from ClinVar and GEM variants, used for external validation. EHR corresponds to electronic health

656 records.

657

658

659

660

661

662

663

664

665

666 **Figure 2.** Receiver operator characteristic curves for 3-class mode of inheritance prediction models (A).

667 Bar-plots showing sensitivity and specificity for 3-class mode of inheritance prediction models (B).

668

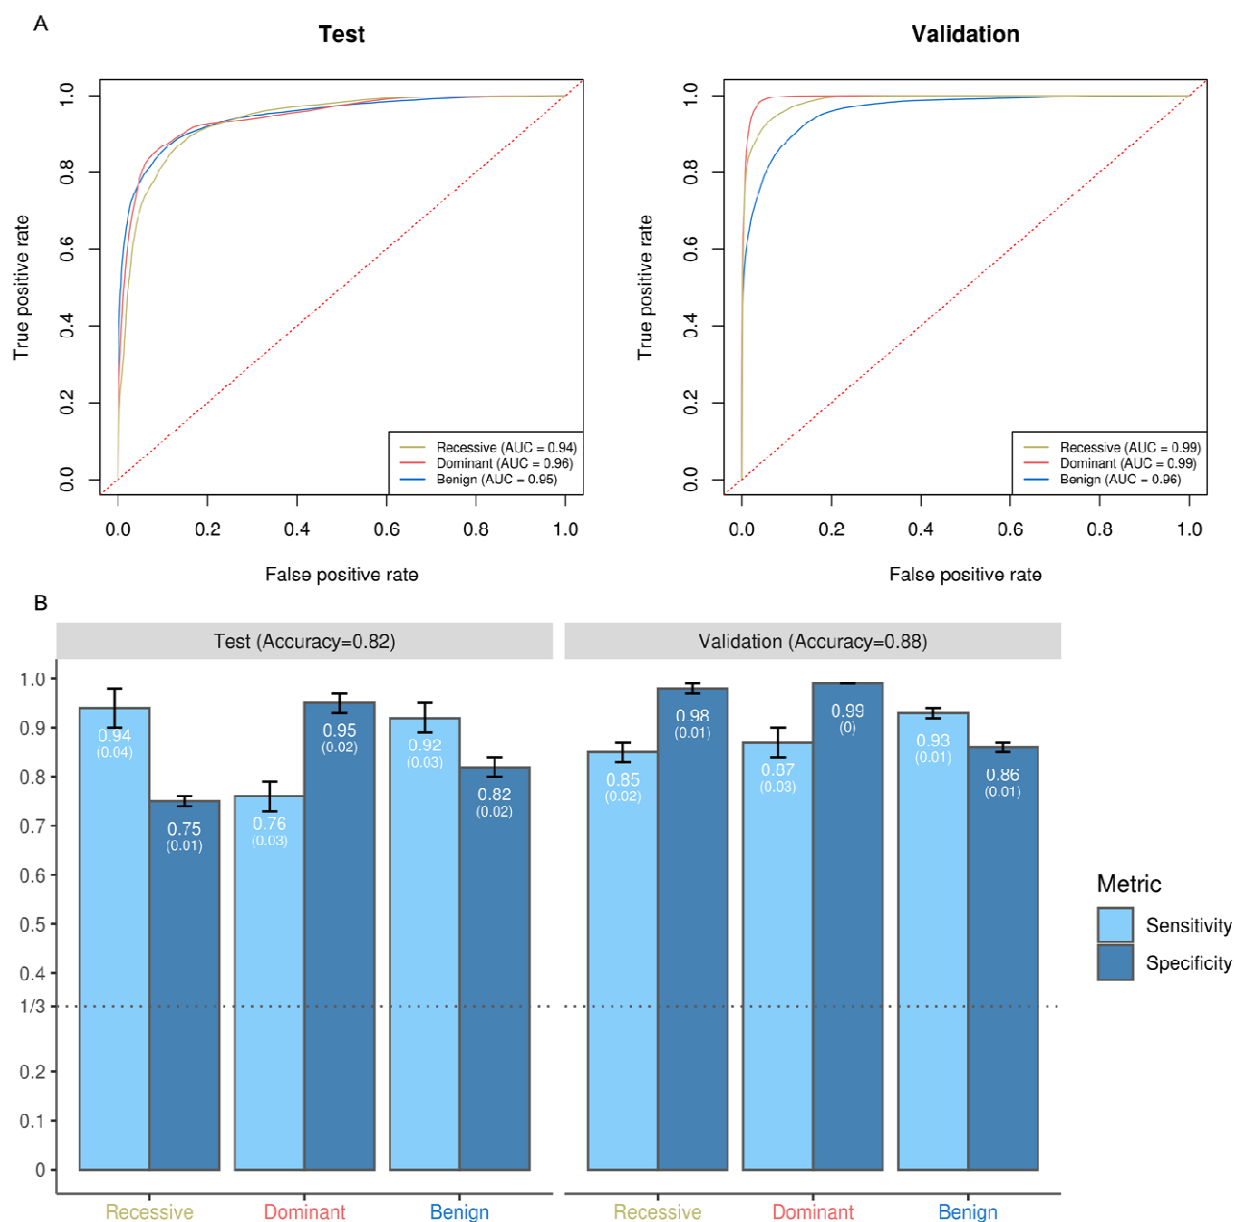

669

670

671

672



673  
674  
675  
676  
677  
678  
679  
680  
681  
682  
683  
684  
685  
686  
687  
688  
689  
690  
691  
692  
693  
694  
695  
696  
697  
698  
699  
700

Test set corresponds to the 10% balanced dataset, built from ExoVar and gnomAD variants, used for testing. Validation set corresponds to the balanced dataset, built from ClinVar and GEM variants, used for external validation. Reported AUC corresponds to the mean across 100 models. Reported Sensitivity and Specificity corresponds to mean (standard deviation) across 100 models. AUC corresponds to area under the receiver operator characteristic curve.

701 **Figure 3:** Bar-plot showing feature importance on 3-class mode of inheritance prediction models (A).

702 Word-clouds representing feature importance on 2-class mode of inheritance prediction models (B).

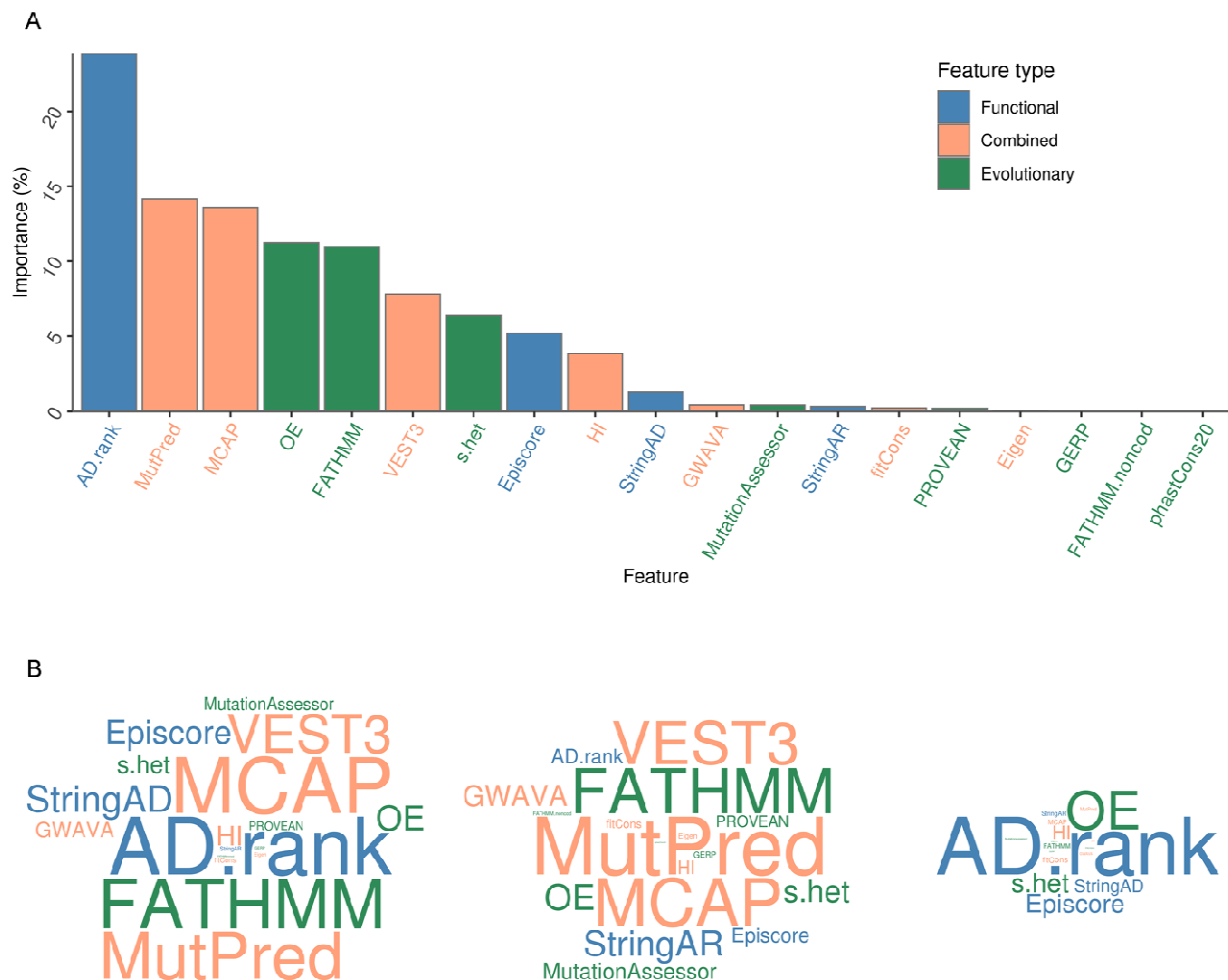

703

704

705 Feature importance is reported as the median across 100 models. Word-clouds represent feature

706 importance on Benign-Dominant (left), Benign-Recessive (middle) and Dominant-Recessive (right)

707 models respectively. Exact feature importance values in 2-class prediction models can be found in

708 Supplementary Figure 6-8.

709

710

711

712 **Figure 4:** Forest plots showing disease association with variants predicted to be Recessive (A), Dominant

713 (B) and Benign (C).

714

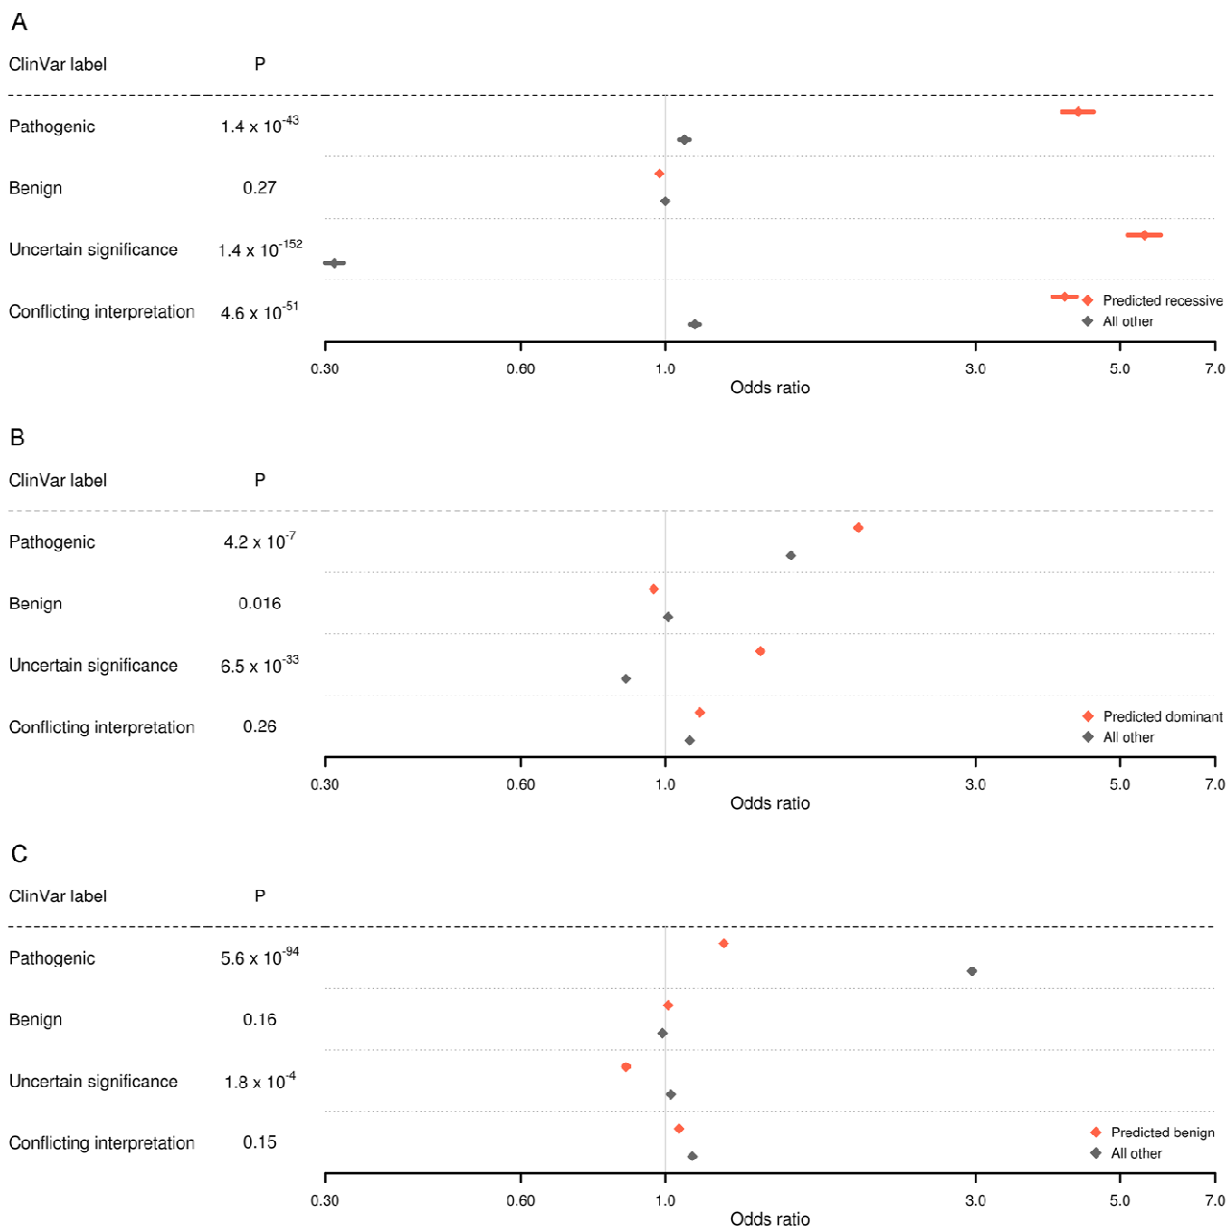

715

716

717

718

719

720 Effect sizes (Odds ratios) and 95% confidence intervals were obtained for individual ancestries using a  
721 Cochran-Mantel-Haenszel (CMH) test. The reported effect sizes correspond to an inverse variance meta-  
722 analysis across ancestries. P values for heterogeneity between Odds ratios are derived from a Q-test Test  
723 set.

724

725

726

727

728

729

730

731

732

733

734

735

736

737

738

739

740

741

742

743

744

745 **Table 1:** Description of significant variant associations with disease.

746

| Variant ID  | Gene    | AF                    | ICD10 codes                                                                                                                         | P value               | OR (95% CI)            | MOI-<br>Pred | OMIM        | ClinVar                                      |
|-------------|---------|-----------------------|-------------------------------------------------------------------------------------------------------------------------------------|-----------------------|------------------------|--------------|-------------|----------------------------------------------|
| rs79985808  | SUMF1   | 0.016                 | Other degenerative diseases of basal ganglia (G23) and Disorders of sphingolipid metabolism and other lipid storage disorders (E75) | $4.03 \times 10^{-5}$ | 126.7 (118.5 to 134.9) | AR           | Recessive   | Benign                                       |
| rs17144835  | DNAH11  | 0.061                 | Other congenital malformations of respiratory system (Q34)                                                                          | $4.04 \times 10^{-7}$ | 35.9 (31.9 to 39.9)    | AR           | Recessive   | Benign                                       |
| rs1800562   | HFE     | 0.022                 | Disorders of mineral metabolism (E83) and Genetic susceptibility to disease (Z15)                                                   | $1.10 \times 10^{-9}$ | 13.7 (10.7 to 16.7)    | AR           | Conflicting | Conflicting interpretations of pathogenicity |
| rs145214720 | COL10A1 | $3.41 \times 10^{-4}$ | Osteochondrodysplasias (Q78) and osteochondrodysplasia with defects of growth of tubular bones and spine (Q77)                      | $3.64 \times 10^{-8}$ | 352.3 (348.9 to 355.7) | AD           | Dominant    | Likely benign                                |
| rs34539681  | COL10A1 | $3.90 \times 10^{-3}$ |                                                                                                                                     | $2.03 \times 10^{-6}$ | 23.4 (15.5 to 31.3)    | AD           | Dominant    | Benign                                       |
| rs140075817 | EXT2    | $2.27 \times 10^{-4}$ |                                                                                                                                     | $2.39 \times 10^{-6}$ | 248.1 (239.8 to 256.4) | AD           | Conflicting | Conflicting interpretations of pathogenicity |
| rs770821909 | EXT2    | $1.30 \times 10^{-4}$ |                                                                                                                                     | $2.36 \times 10^{-6}$ | 471.8 (461.1 to 482.4) | AD           | Conflicting | Uncertain significance                       |
| rs146098187 | EXT2    | $3.57 \times 10^{-4}$ |                                                                                                                                     | $3.17 \times 10^{-6}$ | 262.8 (254.2 to 271.4) | AD           | Conflicting | Benign                                       |
| rs138495222 | EXT2    | $3.57 \times 10^{-4}$ |                                                                                                                                     | $5.93 \times 10^{-7}$ | 161.0 (153.9 to 168.1) | AD           | Conflicting | Conflicting interpretations of pathogenicity |
| rs35221558  | LEMD3   | $1.99 \times 10^{-3}$ |                                                                                                                                     | $4.24 \times 10^{-7}$ | 40.3 (36.1 to 44.5)    | AD           | Dominant    | Likely benign                                |
| rs36105360  | LMNB1   | $9.89 \times 10^{-3}$ | Degenerative diseases of basal ganglia (G23) and disorders of sphingolipid metabolism and other lipid storage disorders (E75)       | $7.74 \times 10^{-7}$ | 7.7 (5.4 to 9.9)       | AD           | Dominant    | Benign                                       |
| rs139644798 | RARS1   | $3.40 \times 10^{-4}$ |                                                                                                                                     | $2.39 \times 10^{-6}$ | 98.1 (91.5 to 104.6)   | AD           | Recessive   | Likely pathogenic                            |
| rs34637584  | LRRK2   | $1.78 \times 10^{-3}$ | Neoplasms of unspecified behavior (D49), parkinson's                                                                                | $1.61 \times 10^{-6}$ | 4.7 (2.4 to 6.9)       | AD           | Dominant    | Pathogenic                                   |

|             |      |                       | disease (G20) and leprosy [Hansen's disease] (A30)                                                                                                                                                                                                                      |                        |                        |    |             |                                              |
|-------------|------|-----------------------|-------------------------------------------------------------------------------------------------------------------------------------------------------------------------------------------------------------------------------------------------------------------------|------------------------|------------------------|----|-------------|----------------------------------------------|
| rs141230910 | SDHB | $5.84 \times 10^{-4}$ | Genetic susceptibility to disease (Z15), phakomatoses (Q85), malignant neoplasm of other endocrine glands and related structures (C74), neoplasm of uncertain behavior of endocrine glands (D44) and malignant neoplasm of other and ill-defined digestive organs (C26) | $1.98 \times 10^{-6}$  | 18.4 (14.9 to 21.8)    | AD | Dominant    | Conflicting interpretations of pathogenicity |
| rs372115732 | TBX4 | $1.13 \times 10^{-4}$ | Primary disorders of muscles (G71) and congenital malformations of limb(s) (Q74)                                                                                                                                                                                        | $8.81 \times 10^{-7}$  | 228.6 (220.1 to 237.1) | AD | Conflicting | Likely benign                                |
| rs141707850 | FBN2 | $1.29 \times 10^{-4}$ | Other congenital musculoskeletal deformities (Q68) and other specified congenital malformation syndromes affecting multiple systems (Q87)                                                                                                                               | $1.34 \times 10^{-6}$  | 153.3 (145.6 to 160.9) | AD | Dominant    | Uncertain significance                       |
| rs147272790 | MBD5 | $2.75 \times 10^{-4}$ | Nonrheumatic aortic valve disorders (I35), congenital malformations of great arteries (Q25), monosomies and deletions from the autosomes, not elsewhere classified (Q93) and other congenital malformations of skin (Q82)                                               | $1.42 \times 10^{-6}$  | 19.2 (15.6 to 22.8)    | AD | Dominant    | Conflicting interpretations of pathogenicity |
| rs77375493  | JAK2 | $6.00 \times 10^{-4}$ | Other venous embolism and thrombosis (I82), polycythemia vera (D45), mast cell neoplasms of uncertain behavior (D47), myeloid leukemia (C92) and other and unspecified diseases of blood and blood-forming organs (D75)                                                 | $3.84 \times 10^{-13}$ | 18.9 (16.6 to 21.2)    | AD | Dominant    | Pathogenic                                   |

747

748

749

750

751

752

753

754

755

756 The significance threshold is set to  $p=1.09 \times 10^{-4}$  for the recessive association test and  $p=7.83 \times 10^{-6}$  for  
757 the dominant association test after a Bonferroni correction based on 455 and 6,382 tests respectively. AF  
758 corresponds to allele frequency, OR corresponds to odds ratio, CI corresponds to confidence interval,  
759 MOI-Pred corresponds to Mode Of Inheritance Predictor, AR corresponds to variants having autosomal  
760 recessive prediction in MOI-Pred, AD corresponds to variants having autosomal dominant prediction in  
761 MOI-Pred, OMIM corresponds to Online Mendelian Inheritance in Man, Conflicting corresponds to  
762 genes having autosomal dominant and autosomal recessive inheritance label in OMIM, Dominant  
763 corresponds to genes having autosomal dominant inheritance label in OMIM, Recessive corresponds to  
764 genes having autosomal recessive inheritance label in OMIM, Conf. Int. corresponds to variants having  
765 conflicting interpretation of pathogenicity label in ClinVar, Benign corresponds to variants having  
766 Benign, Likely benign and/or Benign/Likely benign label in ClinVar, Pathogenic corresponds to variants  
767 having Pathogenic, Likely pathogenic and/or Pathogenic/Likely pathogenic label in ClinVar.

768
